# Supplementary material for: Lessons learned with the Cobra prosthesis in elderly patients with complex distal radius fractures—a retrospective follow-up study
Source: PubMed Central journal article supplement (PMC8783885; doi:10.1007/s00402-021-04101-w), 2021-08-02
Supplement: 402_2021_4101_MOESM1_ESM.pdf [file 402_2021_4101_MOESM1_ESM.pdf]

Online Resource 1: Patient characteristics of the study population

| Patient | Sex | Age (years) | Time injury-prosthesis (days) | Follow up (months) | Injured side | Dominant side | Cause of injury  | AO-Classification | Cemented | Time of surgery (minutes) | Anaesthesia | Hospitalisation (days) | Additional surgery at the time of hemiarthroplasty | Complications               | Revisions                                                            | Multiple comorbidities <sup>a)</sup> | Comments                                                                                                                            |
|---------|-----|-------------|-------------------------------|--------------------|--------------|---------------|------------------|-------------------|----------|---------------------------|-------------|------------------------|----------------------------------------------------|-----------------------------|----------------------------------------------------------------------|--------------------------------------|-------------------------------------------------------------------------------------------------------------------------------------|
| 1       | f   | 66          | 125                           | 12                 | left         | right         | traffic accident | B3                | no       | 250                       | GA          | 6                      | Implant removal, radial plate                      |                             |                                                                      | No                                   | Condition after primary palmar plating, secondary hemiarthroplasty due to radiocarpal instability and consecutive joint destruction |
| 2       | f   | 75          | 2                             | 12                 | left         | right         | fall             | C3                | yes      | 140                       | GA          | 7                      | external fixator                                   |                             |                                                                      | No                                   | open DRF                                                                                                                            |
| 3       | f   | 65          | 10                            | 17                 | right        | left          | fall             | C3                | yes      | 120                       | GA          | 7                      |                                                    | radiocarpal dislocation     | Darrach procedure, derotational osteotomy, PQ-interposition transfer | No                                   |                                                                                                                                     |
| 4       | f   | 73          | 5                             | 19                 | right        | right         | fall             | C3                | no       | 72                        | RA          | 9 (+rehab)             |                                                    | ulnar impaction syndrome    |                                                                      | Yes                                  |                                                                                                                                     |
| 5       | f   | 75          | 3                             | 24                 | left         | right         | fall             | C3                | yes      | 106                       | RA          | 10 (+rehab)            | Darrach procedure                                  |                             |                                                                      | Yes                                  | open DRF                                                                                                                            |
| 6       | f   | 87          | 1                             | 29                 | left         | right         | fall             | C3                | yes      | 133                       | GA          | 8                      | EPL suture                                         | EPL lesion                  |                                                                      | Yes                                  | open DRF                                                                                                                            |
| 7       | f   | 71          | 7                             | 31                 | left         | right         | fall             | C3                | yes      | 203                       | RA          | 5                      | implant removal, bone grafting, Kapandji procedure |                             |                                                                      | Yes                                  | Refracture nine years after initial palmar plating                                                                                  |
| 8       | f   | 68          | 9                             | 33                 | left         | left          | fall             | C3                | yes      | 78                        | GA          | 2                      |                                                    |                             |                                                                      | No                                   |                                                                                                                                     |
| 9       | f   | 74          | 14                            | 40                 | left         | right         | fall             | C3                | no       | 63                        | RA          | 3                      |                                                    |                             |                                                                      | No                                   |                                                                                                                                     |
| 10      | f   | 66          | 9                             | 42                 | left         | none          | fall             | C3                | no       | 144                       | RA          | 16                     | Kapandji procedure                                 | heterotrophic ossifications | HO excision, plate removal, PQ-interposition transfer                | No                                   |                                                                                                                                     |
| 11      | f   | 76          | 35                            | 54                 | left         | left          | fall             | C3                | no       | 93                        | GA          | 4                      |                                                    |                             |                                                                      | No                                   |                                                                                                                                     |
| 12      | f   | 80          | 14                            | 54                 | right        | right         | fall             | C3                | no       | 140                       | RA          | 8                      |                                                    | ulnar impaction syndrome    |                                                                      | No                                   |                                                                                                                                     |
| 13      | m   | 80          | 3                             | 38                 | right        | right         | traffic accident | C3                | yes      | 99                        | RA          | 21 (+rehab)            | dorsoulnar plate                                   |                             |                                                                      | Yes                                  |                                                                                                                                     |

m...male, f...female, DRF... distal radius fracture, EPL... extensor pollicis longus, GA... general anesthesia, RA... regional anesthesia, PQ... pronator quadratus, HO... heterotrophic ossifications, rehab... rehabilitation

a) multiple comorbidities was defined by two or more chronic underlying medical conditions.

Title: Lessons Learned with the Cobra Prosthesis in Elderly Patients with Complex Distal Radius Fractures – A Retrospective Follow-Up Study

Journal: Archives of Orthopaedic and Trauma Surgery

Authors: Benedikt S, Kaiser P, Schmidle G, Kastenberger T, Stock K, Arora R

Affiliation: University Hospital Innsbruck, Department of Orthopaedics and Traumatology, Anichstraße 35, 6020 Innsbruck, Austria

E-mail of the corresponding author: rohit.arora@i-med.ac.at
